# Supplementary material
Source: publisher figshare collection journal article supplement (https://acs.figshare.com/ndownloader/files/4174111)
Supplement: Supplementary file 1 [file 4174111]

## Supporting Information

Tomáš Katriňák, Lubomír Hnědkovský and Ivan Cibulka: Partial Molar Volumes and Partial Molar Isentropic Compressions of Three Polyhydric Alcohols Derived from Propane at Infinite Dilution in Water at Temperatures  $T = (278 \text{ to } 318) \text{ K}$  and Atmospheric Pressure.

Experimental standard molar volumes obtained in this work were combined with data measured in the ranges from  $(298.15 \text{ to } 573.15) \text{ K}$  and  $(0.1 \text{ to } 30) \text{ MPa}^1$  and the entire set was smoothed using a polynomial function

$$V_{m,2}^0/(\text{cm}^3 \cdot \text{mol}^{-1}) = \sum_{i=1}^{N_T} \sum_{j=1}^3 a_{ij} (T/\text{K})^{(i-1)} (p/\text{MPa})^{(j-1)} \quad (\text{S1})$$

The adjustable parameters  $a_{ij}$  were evaluated using the weighted least squares procedure by minimizing the objective function

$$\phi(\{a_{ij}\}) = \sum_{k=1}^N \left\{ \frac{\left( (V_{m,2}^{0(\text{exp})})_k - \sum_{i=1}^{N_T} \sum_{j=1}^3 a_{ij} T_k^{(i-1)} p_k^{(j-1)} \right)^2}{\sigma(V_{m,2}^{0(\text{exp})})_k} \right\} \quad (\text{S2})$$

Estimated experimental uncertainties were used for the weights  $1/\left[\sigma(V_{m,2}^{0(\text{exp})})_k\right]^2$ . The summation in eq S2 is performed over all experimental data points  $N$  measured for a particular solute. Since measurements at three pressures were performed for each isotherm (except for  $T < 298 \text{ K}$ ) the resulting fits are interpolations in pressure (isotherms are fitted with the second order polynomials in pressure) while the maximum order of the polynomial with respect to temperature,  $N_T$ , was chosen according to the significance of respective parameters. A random distribution of deviations between experimental values and those calculated from eq S1 was adopted as a criterion. Values of parameters along with standard deviations and weighted standard deviations of the fits are presented in Table S1. Extrapolations using a polynomial function are not reliable and therefore the calculations of standard molar volumes and derived quantities from the fits for  $T < 298 \text{ K}$  are not recommended for pressures other than  $0.1 \text{ MPa}$ .

**Table S1.** Parameters  $a_{ij}$  of Eq S1. Temperature Range of All Fits is from (278.15 to 573.15) K, for the Pressure Range see the text.

|                                                                |     | Propane-1,2-diol(aq)        | Propane-1,3-diol(aq)        | Propane-1,2,3-triol(aq)     |
|----------------------------------------------------------------|-----|-----------------------------|-----------------------------|-----------------------------|
| $i$                                                            | $j$ | $a_{ij}$                    | $a_{ij}$                    | $a_{ij}$                    |
| 1                                                              | 1   | $5.9703704 \cdot 10^2$      | $3.1215198 \cdot 10^2$      | $-1.4598238 \cdot 10^3$     |
| 1                                                              | 2   | 98.350981                   | 91.730057                   | -63.531470                  |
| 1                                                              | 3   | -3.9226540                  | -3.6593408                  | $7.8873705 \cdot 10^{-2}$   |
| 2                                                              | 1   | -8.5178884                  | -3.5886996                  | 23.404901                   |
| 2                                                              | 2   | -1.3782357                  | -1.3224136                  | 0.83201855                  |
| 2                                                              | 3   | $5.6549600 \cdot 10^{-2}$   | $5.3404500 \cdot 10^{-2}$   | $1.4548479 \cdot 10^{-3}$   |
| 3                                                              | 1   | $5.6855927 \cdot 10^{-2}$   | $2.2342015 \cdot 10^{-2}$   | -0.14919017                 |
| 3                                                              | 2   | $7.9247577 \cdot 10^{-3}$   | $7.8610916 \cdot 10^{-3}$   | $-4.3494163 \cdot 10^{-3}$  |
| 3                                                              | 3   | $-3.3565712 \cdot 10^{-4}$  | $-3.2158663 \cdot 10^{-4}$  | $-2.6070143 \cdot 10^{-5}$  |
| 4                                                              | 1   | $-2.0152316 \cdot 10^{-4}$  | $-7.5143983 \cdot 10^{-5}$  | $5.0579796 \cdot 10^{-4}$   |
| 4                                                              | 2   | $-2.3895419 \cdot 10^{-5}$  | $-2.4657565 \cdot 10^{-5}$  | $1.1449503 \cdot 10^{-5}$   |
| 4                                                              | 3   | $1.0498082 \cdot 10^{-6}$   | $1.0227966 \cdot 10^{-6}$   | $1.4307950 \cdot 10^{-7}$   |
| 5                                                              | 1   | $4.0077539 \cdot 10^{-7}$   | $1.4441358 \cdot 10^{-7}$   | $-9.5981146 \cdot 10^{-7}$  |
| 5                                                              | 2   | $3.9766161 \cdot 10^{-8}$   | $4.3023514 \cdot 10^{-8}$   | $-1.5561906 \cdot 10^{-8}$  |
| 5                                                              | 3   | $-1.8243383 \cdot 10^{-9}$  | $-1.8121481 \cdot 10^{-9}$  | $-3.6888412 \cdot 10^{-10}$ |
| 6                                                              | 1   | $-4.2292063 \cdot 10^{-10}$ | $-1.4914672 \cdot 10^{-10}$ | $9.6643119 \cdot 10^{-10}$  |
| 6                                                              | 2   | $-3.4528476 \cdot 10^{-11}$ | $-3.9574327 \cdot 10^{-11}$ | $9.6692650 \cdot 10^{-12}$  |
| 6                                                              | 3   | $1.6696546 \cdot 10^{-12}$  | $1.6958801 \cdot 10^{-12}$  | $4.6109576 \cdot 10^{-13}$  |
| 7                                                              | 1   | $1.8536367 \cdot 10^{-13}$  | $6.4787942 \cdot 10^{-14}$  | $-4.0326592 \cdot 10^{-13}$ |
| 7                                                              | 2   | $1.2159292 \cdot 10^{-14}$  | $1.4976397 \cdot 10^{-14}$  | $-1.6575051 \cdot 10^{-15}$ |
| 7                                                              | 3   | $-6.2839720 \cdot 10^{-16}$ | $-6.5485771 \cdot 10^{-16}$ | $-2.2575327 \cdot 10^{-16}$ |
| Standard deviation/<br>( $\text{cm}^3 \cdot \text{mol}^{-1}$ ) |     | 0.03                        | 0.03                        | 0.07                        |
| Weighted standard<br>deviation                                 |     | 1.07                        | 1.19                        | 1.76                        |
| Total number of<br>experimental data points                    |     | 39                          | 39                          | 41                          |
